# Supplementary material for: Refining Immunogenicity through Intradermal Delivery of Outer Membrane Vesicles against Shigella flexneri in Mice
Source: MDPI journal article supplement (doi:10.3390/ijms242316910), 2023-11-29
Supplement: s1 [file s1]

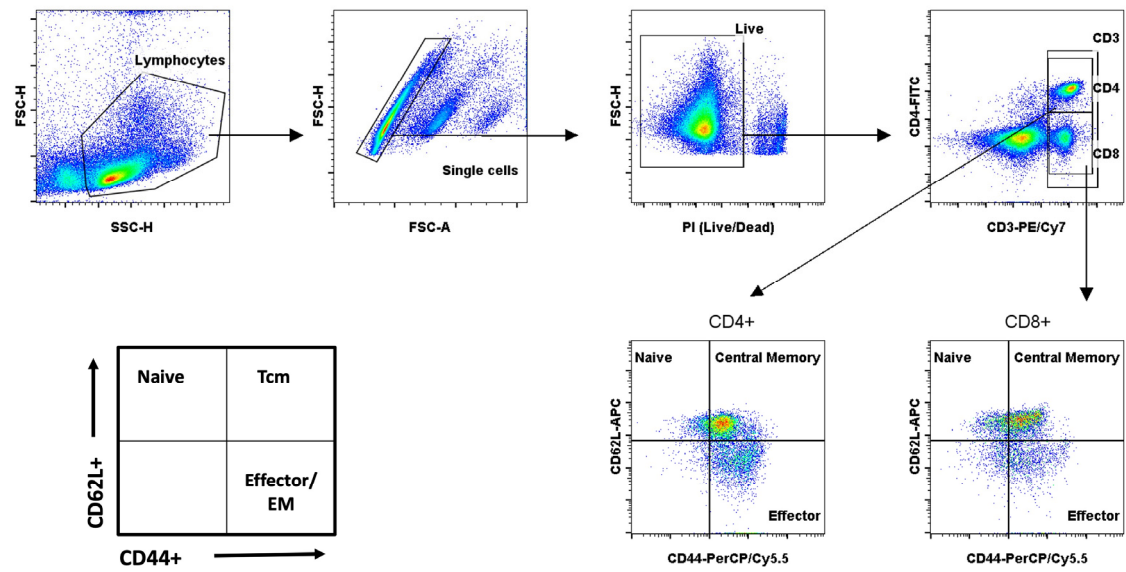

**Figure S1.** Gating strategy for mice splenocyte populations 6 weeks post-immunization. T-lymphocytes were selected from a forward scatter height vs side scatter-height dot plot, and single cells were subsequently selected in a forward scatter-area vs forward scatter height dot plot. From living cell population, T cells were selected by CD3<sup>+</sup> expression and CD8<sup>+</sup> cytotoxic and CD4<sup>+</sup> helper T cells were identified by a CD8 vs CD4 dot plot. From each population, effector or central memory T cells were identified by a CD44 vs CD62L dot plot. (*Tcm*: T central memory cells; *EM*: effector memory).
